# Supplementary material for: A Closer Look at Changes in High-Risk Food-Handling Behaviors and Perceptions of Primary Food Handlers at Home in South Korea across Time
Source: PubMed Central journal article supplement (PMC7602069; doi:10.3390/foods9101457), 2020-10-13
Supplement: foods-09-01457-s001.pdf [file foods-09-01457-s001.pdf]

**Table S1.** Detailed data regarding the discordance between consumers' food safety perceptions and behaviors (Risk perception-behavior gap).

| Topic                                                                                                                       | Questions and Choices                                                                                                                                      | Percent of Respondents or Answers |                | <i>p</i> -value <sup>1</sup> |
|-----------------------------------------------------------------------------------------------------------------------------|------------------------------------------------------------------------------------------------------------------------------------------------------------|-----------------------------------|----------------|------------------------------|
|                                                                                                                             |                                                                                                                                                            | Year                              | Year           |                              |
|                                                                                                                             |                                                                                                                                                            | 2010 (N = 609)                    | 2019 (N = 605) |                              |
| Gap between the consumers' perceptions and behaviors regarding the storage of perishable foods without washing and trimming | Q1. Do you think storing raw materials including fruits, vegetables, meat, and fish/shellfish without preparation (e.g. washing or trimming) is hazardous? |                                   |                |                              |
|                                                                                                                             | Completely hazardous                                                                                                                                       | 27.8%                             | 25.5%          | 0.366                        |
|                                                                                                                             | Mostly hazardous                                                                                                                                           | 44.0%                             | 42.5%          | 0.591                        |
|                                                                                                                             | Moderate                                                                                                                                                   | 21.3%                             | 25.0%          | 0.136                        |
|                                                                                                                             | Mostly safe                                                                                                                                                | 5.9%                              | 5.8%           | 0.925                        |
|                                                                                                                             | Completely safe                                                                                                                                            | 1.0%                              | 1.3%           | 0.582                        |
|                                                                                                                             | <Analysis of the combined responses> <sup>2</sup>                                                                                                          |                                   |                |                              |
|                                                                                                                             | Completely hazardous + Mostly hazardous                                                                                                                    | 71.8%                             | 67.9%          | 0.147                        |
|                                                                                                                             | Completely safe + Mostly safe                                                                                                                              | 6.9%                              | 7.1%           | 0.886                        |
|                                                                                                                             | Q7. Do you wash or trim meat, fish, fruits, and vegetables before storage?                                                                                 |                                   |                |                              |
|                                                                                                                             | Always                                                                                                                                                     | 22.5%                             | 7.9%           | 0.000                        |
|                                                                                                                             | Frequently                                                                                                                                                 | 29.2%                             | 27.8%          | 0.573                        |
|                                                                                                                             | Sometimes                                                                                                                                                  | 15.8%                             | 30.6%          | 0.000                        |
|                                                                                                                             | Seldom                                                                                                                                                     | 20.7%                             | 25.0%          | 0.076                        |
|                                                                                                                             | Never                                                                                                                                                      | 11.8%                             | 8.8%           | 0.079                        |
| <Analysis of the combined responses> <sup>3</sup>                                                                           |                                                                                                                                                            |                                   |                |                              |
| Always + Frequently                                                                                                         | 51.7%                                                                                                                                                      | 35.7%                             | 0.000          |                              |
| Never + Seldom                                                                                                              | 32.5%                                                                                                                                                      | 33.7%                             | 0.655          |                              |
| Gap between the consumers' perceptions and behaviors regarding the frozen foods                                             | Q2. Do you think thawing frozen foods at room temperature is hazardous?                                                                                    |                                   |                |                              |
|                                                                                                                             | Completely hazardous                                                                                                                                       | 26.4%                             | 17.4%          | 0.000                        |
|                                                                                                                             | Mostly hazardous                                                                                                                                           | 36.8%                             | 30.7%          | 0.026                        |
|                                                                                                                             | Moderate                                                                                                                                                   | 22.0%                             | 35.0%          | 0.000                        |
|                                                                                                                             | Mostly safe                                                                                                                                                | 12.0%                             | 14.7%          | 0.163                        |
|                                                                                                                             | Completely safe                                                                                                                                            | 2.6%                              | 2.1%           | 0.585                        |
|                                                                                                                             | Do not know/no response                                                                                                                                    | 0.2%                              | 0.0%           | 0.319                        |
|                                                                                                                             | <Analysis of the combined responses> <sup>2</sup>                                                                                                          |                                   |                |                              |
|                                                                                                                             | Completely hazardous + Mostly hazardous                                                                                                                    | 63.2%                             | 48.1%          | 0.000                        |
|                                                                                                                             | Completely safe + Mostly safe                                                                                                                              | 14.6%                             | 16.9%          | 0.283                        |
|                                                                                                                             | Q12. How do you defrost frozen foods?                                                                                                                      |                                   |                |                              |
|                                                                                                                             | Do not thaw                                                                                                                                                | 4.4%                              | 3.0%           | 0.179                        |
|                                                                                                                             | Place in the refrigerator for 1–2 days before it is cooked                                                                                                 | 17.1%                             | 23.0%          | 0.010                        |
|                                                                                                                             | Use microwave oven                                                                                                                                         | 25.0%                             | 15.5%          | 0.000                        |
|                                                                                                                             | Dip in water at room temperature                                                                                                                           | 16.6%                             | 14.9%          | 0.414                        |
| Place on counter at room temperature                                                                                        | 36.9%                                                                                                                                                      | 43.6%                             | 0.018          |                              |

|                                                                                                         |                                                                      |       |       |       |
|---------------------------------------------------------------------------------------------------------|----------------------------------------------------------------------|-------|-------|-------|
|                                                                                                         | Q5. Do you think storing leftovers at room temperature is hazardous? |       |       |       |
|                                                                                                         | Completely hazardous                                                 | 20.7% | 21.5% | 0.733 |
|                                                                                                         | Mostly hazardous                                                     | 43.3% | 39.3% | 0.156 |
| Gap<br>between<br>the<br>consumers'<br>perceptions<br>and<br>behaviors<br>regarding<br>the<br>leftovers | Moderate                                                             | 23.3% | 32.4% | 0.000 |
|                                                                                                         | Mostly safe                                                          | 11.2% | 6.3%  | 0.003 |
|                                                                                                         | Completely safe                                                      | 1.5%  | 0.5%  | 0.084 |
|                                                                                                         | <Analysis of the combined responses> <sup>2</sup>                    |       |       |       |
|                                                                                                         | Completely hazardous + Mostly hazardous                              | 64.0% | 60.8% | 0.248 |
|                                                                                                         | Completely safe + Mostly safe                                        | 12.6% | 6.8%  | 0.001 |
|                                                                                                         | Q18. How do you store hot and leftover foods?                        |       |       |       |
|                                                                                                         | Do not know/no response                                              | 0.3%  | 0.0%  | 0.158 |
|                                                                                                         | Store immediately in the refrigerator                                | 1.6%  | 3.5%  | 0.043 |
|                                                                                                         | Store in refrigerator after chilling in cold water                   | 2.5%  | 3.5%  | 0.301 |
|                                                                                                         | Store at room temperature                                            | 39.6% | 24.1% | 0.000 |
|                                                                                                         | Store in refrigerator after chilling at room temperature             | 56.0% | 68.9% | 0.000 |

<sup>1</sup> *p*-value was provided according to the results of the Kruskal–Wallis test conducted for the analysis on the differences of responses in each answer option between Year 2010 and Year 2019. <sup>2</sup> To identify the difference between the perception of hazards (i.e., Completely hazardous + Mostly hazardous) and the perception of safety (i.e., Completely safe + Mostly safe), answer options were combined. <sup>3</sup> To identify the difference between positive responses (i.e., Always + Frequently) and negative responses (i.e., Never + Seldom), answer options were combined.

**Table S2.** Detailed data regarding the proper risk perception (i.e., the correct response in line with conventional food safety guidelines) and behaviors of consumers.

| Topic                                                                                               | Questions and Choices                                                                                        | Percent of Respondents or Answers |                           | p-value <sup>1</sup> |
|-----------------------------------------------------------------------------------------------------|--------------------------------------------------------------------------------------------------------------|-----------------------------------|---------------------------|----------------------|
|                                                                                                     |                                                                                                              | Year<br>2010 (N =<br>609)         | Year<br>2019 (N =<br>605) |                      |
| Proper behaviors of consumers in accordance with their perceptions regarding the washing hands      | Q3. Do you think to touch cooked foods after handling raw materials without washing your hands is hazardous? |                                   |                           |                      |
|                                                                                                     | Completely hazardous                                                                                         | 30.2%                             | 28.9%                     | 0.623                |
|                                                                                                     | Mostly hazardous                                                                                             | 53.2%                             | 48.9%                     | 0.136                |
|                                                                                                     | Moderate                                                                                                     | 13.3%                             | 17.4%                     | 0.050                |
|                                                                                                     | Mostly safe                                                                                                  | 3.0%                              | 3.3%                      | 0.726                |
|                                                                                                     | Completely safe                                                                                              | 0.3%                              | 1.5%                      | 0.033                |
|                                                                                                     | <Analysis of the combined responses> <sup>2</sup>                                                            |                                   |                           |                      |
|                                                                                                     | Completely hazardous + Mostly hazardous                                                                      | 83.4%                             | 77.9%                     | 0.014                |
|                                                                                                     | Completely safe + Mostly safe                                                                                | 3.3%                              | 4.8%                      | 0.182                |
|                                                                                                     | Q11. Do you wash your hands to handle other foods after handling meat, fish/shellfish, or eggs?              |                                   |                           |                      |
|                                                                                                     | Always                                                                                                       | 44.7%                             | 41.3%                     | 0.240                |
|                                                                                                     | Frequently                                                                                                   | 29.6%                             | 25.8%                     | 0.142                |
| Sometimes                                                                                           | 8.7%                                                                                                         | 17.5%                             | 0.000                     |                      |
| Seldom                                                                                              | 12.2%                                                                                                        | 10.4%                             | 0.339                     |                      |
| Never                                                                                               | 4.8%                                                                                                         | 5.0%                              | 0.873                     |                      |
| Do not know/no response                                                                             | 0.2%                                                                                                         | 0.0%                              | 0.319                     |                      |
| <Analysis of the combined responses> <sup>3</sup>                                                   |                                                                                                              |                                   |                           |                      |
| Always + Frequently                                                                                 | 74.2%                                                                                                        | 67.1%                             | 0.007                     |                      |
| Never + Seldom                                                                                      | 16.9%                                                                                                        | 15.4%                             | 0.466                     |                      |
| Proper behaviors of consumers in accordance with their perceptions regarding the incomplete cooking | Q4. Do you think to incompletely cook for meat, fish/shellfish, and eggs is hazardous?                       |                                   |                           |                      |
|                                                                                                     | Completely hazardous                                                                                         | 46.0%                             | 38.3%                     | 0.007                |
|                                                                                                     | Mostly hazardous                                                                                             | 44.0%                             | 41.7%                     | 0.408                |
|                                                                                                     | Moderate                                                                                                     | 9.0%                              | 16.4%                     | 0.000                |
|                                                                                                     | Mostly safe                                                                                                  | 0.8%                              | 2.5%                      | 0.023                |
|                                                                                                     | Completely safe                                                                                              | 0.0%                              | 1.2%                      | 0.008                |
|                                                                                                     | Do not know/no response                                                                                      | 0.2%                              | 0.0%                      | 0.319                |
|                                                                                                     | <Analysis of the combined responses> <sup>2</sup>                                                            |                                   |                           |                      |
|                                                                                                     | Completely hazardous + Mostly hazardous                                                                      | 90.0%                             | 80.0%                     | 0.000                |
|                                                                                                     | Completely safe + Mostly safe                                                                                | 0.8%                              | 3.6%                      | 0.001                |
|                                                                                                     | Q16. Do you fully cook foods like meat, chicken, and fish/shellfish for eating?                              |                                   |                           |                      |
|                                                                                                     | Always                                                                                                       | 56.8%                             | 47.6%                     | 0.001                |
| Frequently                                                                                          | 37.3%                                                                                                        | 38.0%                             | 0.790                     |                      |
| Sometimes                                                                                           | 3.4%                                                                                                         | 11.7%                             | 0.000                     |                      |
| Seldom                                                                                              | 1.8%                                                                                                         | 2.3%                              | 0.534                     |                      |
| Never                                                                                               | 0.3%                                                                                                         | 0.3%                              | 0.995                     |                      |
| Do not know/no response                                                                             | 0.3%                                                                                                         | 0.0%                              | 0.158                     |                      |
| <Analysis on the combined responses> <sup>3</sup>                                                   |                                                                                                              |                                   |                           |                      |

|  |                                                                |       |       |       |
|--|----------------------------------------------------------------|-------|-------|-------|
|  | Always + Frequently                                            | 2.1%  | 2.6%  | 0.561 |
|  | Never + Seldom                                                 | 94.1% | 85.6% | 0.000 |
|  | Q6. Do you think to eat leftover without re-heat is hazardous? |       |       |       |
|  | Completely hazardous                                           | 25.9% | 23.3% | 0.286 |
|  | Mostly hazardous                                               | 50.9% | 43.5% | 0.010 |
|  | Moderate                                                       | 17.4% | 26.6% | 0.000 |
|  | Mostly safe                                                    | 5.3%  | 6.1%  | 0.517 |
|  | Completely safe                                                | 0.3%  | 0.5%  | 0.649 |
|  | Do not know/no response                                        | 0.2%  | 0.0%  | 0.319 |
|  | <Analysis of the combined responses> <sup>2</sup>              |       |       |       |
|  | Completely hazardous + Mostly hazardous                        | 76.8% | 66.8% | 0.000 |
|  | Completely safe + Mostly safe                                  | 5.6%  | 6.6%  | 0.454 |
|  | Q19. Do you re-heat leftovers for eating?                      |       |       |       |
|  | Always                                                         | 46.3% | 50.6% | 0.136 |
|  | Frequently                                                     | 45.6% | 34.4% | 0.000 |
|  | Sometimes                                                      | 6.7%  | 12.2% | 0.001 |
|  | Seldom                                                         | 0.5%  | 1.5%  | 0.080 |
|  | Never                                                          | 0.5%  | 1.3%  | 0.127 |
|  | Do not know/no response                                        | 0.3%  | 0.0%  | 0.158 |
|  | <Analysis of the combined responses> <sup>3</sup>              |       |       |       |
|  | Always + Frequently                                            | 92.0% | 85.0% | 0.000 |
|  | Never + Seldom                                                 | 1.0%  | 2.8%  | 0.020 |

<sup>1</sup>*p*-value was provided according to the results of the Kruskal–Wallis test conducted for the analysis on the differences of responses in each answer option between Year 2010 and Year 2019. <sup>2</sup> To identify the difference between the perception of hazards (i.e., Completely hazardous + Mostly hazardous) and the perception of safety (i.e. Completely safe + Mostly safe), answer options were combined. <sup>3</sup> To identify the difference between positive responses (i.e., Always + Frequently) and negative responses (i.e. Never + Seldom), answer options were combined.
